RESEARCH ARTICLE

# Antioxidant Properties and Gastroprotective Effects of 2-(Ethylthio)Benzohydrazones on Ethanol-Induced Acute Gastric Mucosal Lesions in Rats

Nafal Nazarbahjat<sup>1</sup>, Farkaad A. Kadir<sup>2\*</sup>, Azhar Ariffin<sup>1\*</sup>, Mahmood A. Abdulla<sup>3‡</sup>, Zanariah Abdullah<sup>1‡</sup>, Wageeh A. Yehye<sup>4</sup>

**1** Department of Chemistry, Faculty of Science, University of Malaya, Kuala Lumpur, Malaysia, **2** Division of Human Biology, Faculty of Medicine, International Medical University, Kuala Lumpur, Malaysia, **3** Department of Biomedical Science, Faculty of Medicine, University of Malaya, Kuala Lumpur, Malaysia, **4** Nanotechnology & Catalysis Research Centre (NANOCAT), University of Malaya, Block 3A, Institute of Postgraduate Studies Building, Kuala Lumpur, Malaysia

☉ These authors contributed equally to this work.

‡ These authors also contributed equally to this work.

\* [azhar70@um.edu.my](mailto:azhar70@um.edu.my) (AA); [faalhadi@yahoo.com](mailto:faalhadi@yahoo.com); [FarqadAbdulahadi@imu.edu.my](mailto:FarqadAbdulahadi@imu.edu.my) (FK)

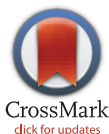

**OPEN ACCESS**

**Citation:** Nazarbahjat N, Kadir FA, Ariffin A, Abdulla MA, Abdullah Z, Yehye WA (2016) Antioxidant Properties and Gastroprotective Effects of 2-(Ethylthio)Benzohydrazones on Ethanol-Induced Acute Gastric Mucosal Lesions in Rats. PLoS ONE 11(6): e0156022. doi:10.1371/journal.pone.0156022

**Editor:** Yvette Tache, University of California, Los Angeles, UNITED STATES

**Received:** January 29, 2016

**Accepted:** May 9, 2016

**Published:** June 7, 2016

**Copyright:** © 2016 Nazarbahjat et al. This is an open access article distributed under the terms of the [Creative Commons Attribution License](https://creativecommons.org/licenses/by/4.0/), which permits unrestricted use, distribution, and reproduction in any medium, provided the original author and source are credited.

**Data Availability Statement:** All relevant data are within the paper and its Supporting Information files.

**Funding:** This work was supported by: 1. University of Malaya Research Grant UMRG (RG149-11AFR); 2. University of Malaya Research Grant UMRG (RPO43A-15HTM); 3. Postgraduate graduate research grant (PG033-2012B); <http://umresearch.um.edu.my/mainpage.php?module=Maklumat&kategori=86&id=63&papar=1>.

**Competing Interests:** The authors have declared that no competing interests exist.

## Abstract

A series of new 2-(ethylthio)benzohydrazone derivatives (1–6) were prepared and characterised by IR, <sup>1</sup>H NMR, and <sup>13</sup>C NMR spectroscopy and mass spectrometry. The newly prepared compounds were screened for their *in vitro* antioxidant activities using free radical scavenging 2,2-diphenyl-1-picrylhydrazyl (DPPH) and ferric reducing antioxidant power (FRAP) assays. Among them, most powerful antioxidant, compound 1 has been selected in order to illustrate anti-ulcer effect on ethanol-induced gastric mucosal lesions in rats. Four groups of *Sprague Dawley* rats were respectively treated with 10% Tween 20 as ulcer control group, 20 mg/kg omeprazole as reference group, 50 mg/kg and 100 mg/kg compound 1 as experimental animals. Macroscopically, ulcer control group showed extensive hemorrhagic lesions of gastric mucosa compared with omeprazole or compound 1. Rats pre-treated with compound 1 showed increased in gastric pH and gastric mucus. Histologically, ulcer control group showed severe damage to gastric mucosa with edema and leucocytes infiltration of submucosal layer. In immunohistochemical analysis, rats which were pre-treated with compound 1 showed up-regulation of HSP70 and down-regulation of Bax proteins. In conclusion, the gastroprotective effect of compound 1 may be due to its antioxidant activity, and/or due to up-regulation of HSP70 and down-regulation of Bax protein in stained tissue section.

## Introduction

Reactive oxygen species (ROS) and free radicals such as superoxide anion radical, hydroxyl radicals, and lipid peroxides are the injurious species known to cause many degenerative

diseases [1]. There are evidences for the aid of ROS in the etiology and pathophysiology of human diseases, such as neurodegenerative disorders, viral infections, autoimmune gastrointestinal inflammation and peptic ulcer [2, 3]. Gastric ulcer is an illness that affects a considerable number of people worldwide. The pathological basis for the development of gastric ulcer is multifactorial. It includes factors which disturb gastric mucosal integrity, such as mucus secretion, mucosal barrier, acid-pepsin secretion, blood flow, cellular regeneration and endogenous protective agents [4]. Long ago, it was thought that stress is one of the etiological factors in the incidence of gastric ulcer by increasing catecholamine levels leading to vasoconstriction [5]. A recent study has also shown the involvement of oxidative stress in the pathogenesis of stress-induced gastric ulcer [6]. Additionally, cigarette smoking, nutritional deficiencies, infections, *Helicobacter pylori*, frequent and chaotic use of non-steroidal anti-inflammatory drugs (NSAIDs) was also reported to be etiological factors [7]. Although the usage of proton-pump inhibitors (PPI) as a classic anti-ulcer drug therapy has revolutionized treatment of peptic ulcers and other gastrointestinal disorders, there is still no complete cure for this disease. It has been shown that long term use of these drugs may be associated with ineffectiveness of different drug regimens and even resistance to these drugs are emerging [8]. Thus, there is an urgent need to identify more effective and safe anti-ulcer agents. Currently, a widespread search has been launched to find new synthetic compounds with antiulcer properties. Schiff base compounds have received much attention in the field of chemistry and biology due to their broad range of biological activities such as antibacterial [9], anti-inflammatory [10], antioxidant and antigastric ulcer properties [11]. The attachment of hydroxyl groups on the aromatic ring makes hydroxyl substituted Schiff bases the effective antioxidants, has also been and potential drugs for the prevention of diseases due to free radical damage [12]. It is demonstrated that many drugs and formulations possess potent antioxidant action and are effective in healing the experimentally-induced gastric ulcers [13–17]. Thus, our strategy involves the synthesis of new Schiff bases, 2-(ethylthio)benzohydrazone derivatives. Among them, the most powerful antioxidant Schiff base, whether through hydrogen or electron transfer mechanisms, will be selected in order to illustrate its anti-ulcer effect on ethanol-induced gastric mucosal lesions in rats.

## Materials and Methods

### *In vitro* antioxidant activity assays

**1,1-Diphenyl-2-picrylhydrazyl (DPPH) radical scavenging activity.** Determination of the free radical scavenging activity of the synthesized compounds was performed as reported [18]. A solution of 195  $\mu$ l of 100  $\mu$ M DPPH reagent in 96% ethanol was added to an ethanolic solution (5  $\mu$ l) of the synthesized compound and mixed in a 96-well plate. The mixture was allowed to stand at room temperature and the absorption intensity was measured at intervals of 20 minutes for 3 hours at 515 nm. The slope was calculated from a graph of OD 515 nm vs. time (min). The percentage inhibition of the DPPH radical was calculated according to the following formula:

$$\text{DPPH radical scavenged (\%)} = [(OD \text{ blank} - OD \text{ sample}) / OD \text{ blank}] \times 100$$

Where,

OD blank is the absorbance of the control DPPH solution, OD sample is the tested compound absorbance.

IC<sub>50</sub> (compound concentration required to reduce the absorbance of the DPPH control solution by 50%) was then calculated.

**Ferric ion reducing power (FRAP) assay.** The reducing capacities of the prepared compounds were measured by the method of Benzie and Strain with a modification [19]. First, 10

ml of acetate buffer (300 mM) was adjusted to pH 3.6 by mixing with 3.1 g  $\text{CH}_3\text{COONa} \cdot 3\text{H}_2\text{O}$  and 16 ml glacial acetic acid. Next, a 2,4,6-tripyridyl-s-triazine TPTZ solution was prepared by dissolving 10 mM TPTZ in 40 mM HCl. Then, 1 ml of the 2,4,6-tripyridyl-s-triazine TPTZ solution was mixed with the FRAP solution, and 1 ml of ferric chloride hexahydrate (20 mM) in distilled water. The FRAP solution was warmed to 37°C, the tested compound was added to it, and the mixture was left to react in the dark. The absorbance was monitored spectrophotometrically at 593 nm. The results were expressed in  $\mu\text{M}$  ferrous/g dry mass and compared with the reference compounds.

## Gastric ulcer study

**Omeprazole.** In this study, omeprazole was used as the reference anti-ulcer drug, and was obtained from the University Malaya Medical Centre Pharmacy. The drug was dissolved in 10% Tween 20 and administered orally to the rats in concentrations of 20 mg/kg body weight (5 ml/kg) [20].

**Ethics statement.** This study was carried out according to the criteria outlined in the "Guide for the Care and Use of laboratory Animals" prepared by the National Academy of Sciences and published by the national Institute of health. The protocol was approved by the Institutional Animal Care and Use Committee of University of Malaya (UM IACUC) with Ethic Numbers: PM/07/05/2012/MAA (a) (R) and PM/28/09/2012/MAA (R). All surgery was performed under xylazine and ketamine anesthesia and all efforts were made to minimize suffering.

**Acute toxicity test and experimental animals.** Adult healthy female *Sprague Dawley* rats (6–8 weeks old) were obtained from the Animal House Experimental Unit, Faculty of Medicine, University of Malaya, Kuala Lumpur. The rats weighed between 180–200 g. The rats were given standard rat pellets and tap water. The acute toxic study was used to determine a safe dose for synthesized compound. This study was carried out by the "fixed dose" method of OECD (Organization for Economic Co-operation and Development) Guideline No.420 [21]. The fixed dose method with the starting dose of 500 mg/kg body weight was adopted. The rats were fasted overnight and next day the compound (suspended in 10% tween 80 solutions) was administered orally at a dose level 500 mg/kg. Then the rats were observed continuously for 3 hours for general behavioral, neurological, and autonomic profiles and then every 30 minutes for next 3 hours and finally for mortality after 24 hours till 14 days [22] and throughout this period of observation, no cases of death among the rats were occurred. After overnight fasting, the animals were sacrificed on the day 15; the rats were anaesthetized by intramuscular injection of 50 mg/kg ketamin mixed with xylazine 5 mg/kg. The abdomen and thoracic cavities were opened by a mid-ventral abdominal incision on each animal. The liver and kidney were carefully observed for any gross pathology. Histology and serum biochemical parameters were determined [23, 24]. Through the jugular vein, blood was withdrawn and collected into the plain tube with activated gel for determination of the liver and kidney function tests by the blood analysis machine at the Clinical Diagnosis Laboratory of Medical Centre (CDL) in University Malaya Hospital.

**Experimental animals for gastric ulcer.** Healthy *Sprague Dawley* rats of 6–8 weeks old and weighing (200–225 g) were obtained from the Experimental Animal House, Faculty of Medicine, University of Malaya, Kuala Lumpur. The rats were divided randomly into 5 groups of 6 rats each. Each rat was placed individually in a separate cage (one rat per cage) with wide-mesh wire bottoms to prevent coprophagia during the experiment. The animals were fed on standard pellets and tap water.

**Gastric ulcer-induction by ethanol.** The rats were fasted for 24 hours before the experiment but were allowed free access to drinking water up till 2 hours before the experiment [25]. Gastric ulcer was induced by orogastric intubation of absolute ethanol (5 ml/kg) [20]. Ulcer

control groups were orally administered vehicle (10% Tween 20, 5 ml/kg). The reference group received oral doses of 20 mg/kg omeprazole in 10% Tween 20 (5 ml/kg) as positive control. Experimental groups were orally administered of compound 1 in 10% Tween 20 (5 ml/kg) at doses of 50 and 100 mg/kg. One hour after this pretreatment, all groups of rats were administered orally with absolute ethanol (5 ml/kg) in order to induce gastric ulcers. The rats were euthanized 60 minutes later [26], by means of overdose of xylazine and ketamine anesthesia and their stomachs were immediately excised, washed and kept in containers of normal saline.

**Gross pathological evaluation of acute gastric ulcer.** The gastric mucosa of each rat was macroscopically examined for any elongated band of haemorrhagic lesion. The ulcer area of each band (length and width) were measured by a planimeter ( $10 \times 10 \text{ mm}^2 = \text{ulcer area}$ ) under dissecting microscope (1.8x). The ulcerated area was measured by counting the number of small squares,  $2 \text{ mm} \times 2 \text{ mm}$ , covering each ulcer band. The sum of the ulcer areas for each stomach was applied in the calculation of the ulcer area (UA) where in the sum of small squares  $\times 4 \times 1.8 = \text{UA (mm}^2\text{)}$ . The inhibition percentage (I %) was calculated by the following formula [12, 27]:

$$(I \%) = [(UA_{\text{control}} - UA_{\text{treated}}) \div UA_{\text{control}}] \times 100$$

**Histopathological evaluation of acute gastric ulcer.** Specimens of the gastric walls for all the animal groups were fixed in 10% buffered formalin solution, processed by light microscopy by paraffin slice technique. Sections with  $5 \mu\text{m}$  thickness were stained with hematoxylin and eosin (H & E) stain for histological evaluation [27]. Additionally, a special stain Periodic Acid Schiff Base (PAS) was used to evaluate mucus production, following the manufacture instruction (Sigma Periodic Acid-Schiff -PAS Kit). For further analysis, immunohistochemistry stain using Dako ARK™ was performed to detect the localization of HSP-70 and Bax proteins. Both proteins were purchased from Santa Cruz Biotechnology, Inc., California, USA.

**Mucus content measurement.** The stomach production of mucus was measured in each rat that was subjected to absolute ethanol-induced gastric lesions. The gastric mucosa of each rat was obtained by gentle scraping the mucosa with a glass slide and the collected mucus were weighed by using a precision electronic balance [28].

**Gastric juice (pH) measurement.** Hydrogen ion concentration for the samples of gastric contents was measured by pH metric titration with 0.1 N NaOH solutions using digital pH meter [27, 29].

## Statistical analysis

All values were reported as mean  $\pm$  S.E.M. The statistical significance of differences between groups was assessed using a one-way analysis of variance (ANOVA) followed by post hoc analysis by the prism statistical package. A value of  $p < 0.05$  was considered significant.

## Experimental

All chemicals and solvents were of analytical grade and purchased from Aldrich and Merck. Melting points were determined using a MEL-TEMP II apparatus and are uncorrected. IR spectra were recorded from  $4000\text{--}400 \text{ cm}^{-1}$  using a Perkin Elmer 400 Fourier transforms infrared (FTIR) Spectrometer.  $^1\text{H}$  NMR (400 MHz) and  $^{13}\text{C}$  NMR (100 MHz) spectra were recorded on a BRUKER-AVN III 400 MHz instrument using DMSO- $d_6$  as solvent and TMS as an internal standard. Mass spectra were recorded on TSQ7000 for HREI/MS. The Supplementary Data section reports the synthesis and physicochemical characterization of 2-



(ethylsulfanyl)-*N'*-[(substitutedphenyl)methylidene]benzohydrazide (2–6). The general synthetic procedure of compound 1 as an example is given below.

**General procedure for the synthesis of 2-(ethylsulfanyl)-*N'*-[(substitutedphenyl)methylidene]benzohydrazide (1–6).** To a warm stirred solution of aryl aldehyde (3 mmol in 20 ml absolute ethanol), 2-(ethylsulfanyl)benzo hydrazide (3 mmol) was added in small portion, and refluxed for 7 hours, after cooling the mixture, a precipitate was washed with cold ethanol, then recrystallized from suitable solvent.

*2-(ethylsulfanyl)-N'-[(4-hydroxy-3-methoxyphenyl)methylidene] benzohydrazide (1):* This was synthesized from 4-hydroxy-3-methoxybenzaldehyde, colourless solid (Yield: 90%). m. p. 236–238°C. IR (KBr) ( $\nu$ ,  $\text{cm}^{-1}$ ) 3545 (OH phenol), 3158 (NH), 1616 (C = O), 1579 (C = N).  $^1\text{H}$  NMR (DMSO- $d_6$ )  $\delta$  ppm [S1 Fig](#): 1.06 [t, 3H, H8a, H8b, H8c, (Z isomer)], 1.24 (E isomer), 2.9 [q, 2H, H7a, H7b, (Z isomer)], 2.98 (E isomer), 3.64 [s, 3H, OCH<sub>3</sub>, (Z isomer)], 3.85 (E), 6.84 (Z) [d, J = 7.9, H15, (Z isomer)], 6.86 (E), 7.07 (Z) [d, J = 8.1, 1H, H4, (Z isomer)], 7.09 (E), 7.29 (Z) [m, 2H, H12, H2, (Z isomer)], 7.32 (E), 7.46 [m, 3H, H16, H3, H5, (Z isomer)], 7.48 (E), 7.90 [s, 1H, H10, (Z isomer)], 8.18 (E), 9.39 [s, 1H, OH, (Z isomer)], 9.55 (E), 11.58 (E) [s, 1H, NH, (E isomer)], 11.64 (Z isomer).  $^{13}\text{C}$  NMR (DMSO- $d_6$ )  $\delta$  ppm [S2 Fig](#): 13.83 [1C, C8, (E isomer)], 14.31 (Z isomer), 26.29 [1C, C7, (E isomer)], 27.34 (Z isomer), 55.20 [1C, OCH<sub>3</sub>, (Z isomer)], 55.53 (E isomer), 108.94 (E) [1C, C12, (E isomer)], 109.58 (Z), 115.41 [1C, C15, (E and Z isomers)], 120.65 (E) [1C, C16, (E isomer)], 122.09 (Z), 125.07 (E) [1C, C2, (E isomer)], 125.51 (Z), 125.61 (E) [1C, C4, (E and Z isomers)], 127.68 (E) [1C, C5, (E isomer)], 127.90 (Z), 127.98 (E) [1C, C11, (E isomer)], 129.17 (Z), 129.46 (E) [1C, C3, (E isomer)], 130.27 (Z), 133.46 [1C, C6, (E isomer)], 135.65 (Z), 135.95 (E) [1C, C1, (E isomer)], 138.42 (Z), 143.18 (Z) [1C, C10, (Z isomer)], 147.89 (E isomer), 147.66 [1C, C14, (Z isomer)], 148.02 (E isomer), 148.41 (E) [1C, C13, (E isomer)], 148.96 (Z), 163.67 [1C, C9, (E isomer)], 169.93 (Z isomer). HREIMS  $m/z$ : 330.1035 [ $M^+$ ] (calc. for C<sub>17</sub>H<sub>18</sub>N<sub>2</sub>O<sub>3</sub>S<sub>1</sub> 330.1036).

*2-(ethylsulfanyl)-N'-[(2,3,4-trimethoxyphenyl)methylidene]benzohydrazide (2):* This was synthesized from 2,3,4-trimethoxybenzaldehyde, colorless solid (Yield: 90%). m.p. 182°C. IR (KBr) ( $\nu$ ,  $\text{cm}^{-1}$ ) 3158(NH), 1635 (C = O), 1594 (C = N).  $^1\text{H}$  NMR (DMSO- $d_6$ )  $\delta$  ppm [S3 Fig](#): 1.12 (Z) [t, 3H, H8a, H8b, H8c, (Z isomer)], 1.22 (E isomer), 2.87 (Z) [q, 2H, H7a, H7b, (Z isomer)], 2.99 (E isomer), 3.73 (Z) [s, 9H, OCH<sub>3</sub>, (Z isomer)], 3.86 (E isomer), 6.98 (E) [m, 1H, H15, (E and Z isomers)], 7.28 (E isomer) [m, 1H, H16, (E and Z isomers)], 7.45 (E isomer) [m, 3H, H2, H3, H4, (E and Z isomers)], 7.93 (E isomer) [d, J = 8.8, 1H, H5, (E and Z isomers)], 8.2 [s, 1H, H10, (Z isomer)], 8.48 (E isomer), 11.68 [s, 1H, NH, (E and Z isomers)].  $^{13}\text{C}$  NMR (DMSO- $d_6$ )  $\delta$  ppm [S4 Fig](#): 14.27 (E) [1C, C8, (E isomer)], 14.77 (Z isomer), 26.68 (E) [1C, C7, (E isomer)], 27.81 (Z isomer), 56.45 (E) [1C, C19, OCH<sub>3</sub>, (E and Z isomers)], 60.96 (E) [1C, C18, OCH<sub>3</sub>, (E and Z isomers)], 62.29 (E) [1C, C17, OCH<sub>3</sub>, (E and Z isomers)], 109.23 (E) [1C, C15, E and Z isomers], 120.61 (E) [1C, C11, (E isomer)], 120.75 (Z isomer), 121.04 (E) [1C, C16, (E and Z isomers)], 125.46 (E) [1C, C2, (E isomer)], 126.10 (Z isomer), 128.07 [1C, C5, (E isomer)], 128.28 (Z isomer), 128.44 (E) [1C, C4, (E and Z isomers)], 129.78 [1C, C3, (E isomer)], 130.89 (Z isomer), 136.00 (E) [1C, C6, (E and Z isomers)], 136.33 (E) [1C, C1, (E and Z isomers)], 141.99 (E) [1C, C13, (E and Z isomers)], 143.66 (E) [1C, C10, (E and Z isomers)], 153.12 (E) [1C, C12, (E and Z isomers)], 155.64 (E) [1C, C14, (E and Z isomers)], 164.20 (E) [1C, C9, (E and Z isomers)]. HREIMS  $m/z$ : 374.1299 [ $M^+$ ] (calc. for C<sub>19</sub>H<sub>23</sub>N<sub>2</sub>O<sub>4</sub>S<sub>1</sub> 374.1300).

*2-(ethylsulfanyl)-N'-[(3,5-di-tert-butyl-4-hydroxyphenyl)methylidene]-benzohydrazide (3):* This was synthesized from 3, 5-di-tert-butyl-4-hydroxybenzaldehyde, colorless solid (Yield: 90%). m.p. 212°C. IR (KBr) ( $\nu$ ,  $\text{cm}^{-1}$ ) 3630 (OH phenol), 3180 (NH), 1639 (C = O), 1605 (C = N).  $^1\text{H}$  NMR (DMSO- $d_6$ )  $\delta$  ppm [S5 Fig](#): 1.09 (Z) [t, 3H, H8a, H8b, H8c], 1.23 (E), 1.29 (Z) [s, 18H, 2× t-Bu, Z isomer], 2.86 (Z) [q, 2H, H7a, H7b, (Z isomer)], 2.92 (E), 7.17 (E) [s, 1H, OH, (E and Z isomers)], 7.28 (E) [m, 1H, H4, (E and Z isomers)], 7.43 [m, 5H, H2, H3, H12,

H5, H16 (E and Z isomers)], 7.88 (Z) [s, 1H, H10, (Z isomer)], 8.19 (E), 11.55 (E) [s, 1H, NH, (E isomer)], 11.63 (Z isomer).  $^{13}\text{C}$  NMR (DMSO- $d_6$ )  $\delta$  ppm [S6 Fig](#): 13.82 [1C, C8, (E isomer)], 14.4 (Z), 34.37 (E) [1C, C7, (E isomer)], 34.45 (Z), 34.49 [6C, 2 $\times$ -C(CH $_3$ ) $_3$ , E and Z isomers)], 39.03 [2C, 2 $\times$ -C(CH $_3$ ) $_3$ , (E and Z isomers)], 123.41 (Z) [2C, C12, C16, (Z isomer)], 123.88 (E), 125.1 (E) [1C, C11, (E isomer)], 125.69 (Z), 127.58 (Z) [1C, C2, (Z isomer)], 127.89 (E), 129.01 (E) [1C, C5, (E isomer)], 129.59 (Z), 130.29 (E) [1C, C4, (E and Z isomers)], 133.31 (E) [1C, C3, (E and Z isomers)], 135.65 (E) [1C, C6, (E and Z isomers)], 135.91 (E) [1C, C1, (E and Z isomers)], 138.76 (E) [2C, C13, C15, (E isomer)], 139.21 (Z), 143.47 (E) [1C, C10, (E isomer)], 148.78 (Z), 155.51 [1C, C14, (Z isomer)], 156.13 (E), 163.20 (E) [1C, C9, (E isomer)], 170.10 (Z). HREIMS  $m/z$ : 412.2175 [M $^+$ ] (calc. for C $_{24}$ H $_{32}$ N $_2$ O $_2$ S $_1$  412.2185).

**Synthesis of 2-(ethylsulfanyl)-N'-[(4-hydroxy-3-ethoxyphenyl)methylidene]-benzohydrazide (4):** This was synthesized from 4-hydroxy-3-ethoxybenzaldehyde, the solid was recrystallized from ethanol 5:1 water to obtain white solid (1 gm 90%), m.p. 200–202°C. IR (KBr) ( $\nu$ ,  $\text{cm}^{-1}$ ), 3174 (OH phenol), 3100 (NH), 2978 (C-H aromatic), 1623 (C = O), 1582 (C = N).  $^1\text{H}$  NMR (DMSO- $d_6$ )  $\delta$  ppm [S7 Fig](#): 1.11 (Z) [t, 3H, H8a, H8b, H8c, (Z isomer)], 1.21 (E), 1.25 (t, 3H, OCH $_2$ CH $_3$ , (Z isomer)], 1.4 (E), 2.88 (Z) [q, 2H, H7a, H7b, (Z isomer)], 2.97 (E), 3.84 (Z) [q, 2H, OCH $_2$ , (Z isomer)], 4.09 (E), 6.72 [m, 1H, H15, (Z isomer)], 6.9 (E), 7.06 (E) [d, J = 8.1, 1H, H5, (E and Z isomers)], 7.29 (E) [m, 2H, H4, H16, (E and Z isomers)], 7.45 [m, 3H, H2, H3, H12, (E and Z isomers)], 8.14 (Z) [s, 1H, H10, (Z isomers)], 8.15 (E), 9.42 (Z) [br.s, 1H, OH, (Z isomers)], 9.57 (E), 11.62 (E) [s, (1H) (NH), (E isomer)], 11.66 (Z).  $^{13}\text{C}$  NMR (DMSO- $d_6$ )  $\delta$  ppm [S8 Fig](#): 14.30 (E) [1C, C8, (E isomer)], 15.17 (Z) 26.79 (E) [1C, OCH $_2$ CH $_3$ , (E and Z isomers)], 27.87 (Z) [1C, C7, (Z isomer)], 31.13 (E), 61.05 (Z) [1C, OCH $_2$ , (Z isomer)], 61.35 (E), 110.79 (E) [1C, C12, (E isomer)], 111.22 (Z), 115.9 [1C, C15, E and Z isomers)], 121.1 [1C, C16, (Z isomer)], 122.5 (E), 125.5 (E) [1C, C2, (E isomer)], 126.0 (Z), 128.1 [1C, C5, (Z isomer)], 128.3 (E), 128.4 [1C, C11, (E and Z isomers)], 129.6 (Z) [1C, C4, (Z isomer)], 129.9 (E), 130.8 [1C, C3, (E and Z isomers)], 136.1 [1C, C6, (Z isomer)], 136.3 (E), 143.7 [1C, C1, (E and Z isomers)], 147.6 [1C, C10, (E and Z isomers)], 148.4 [1C, C13, (E and Z isomers)], 149.7 [1C, C14, (E and Z isomers)], 164.2 (E) [1C, C9, (E isomer)], 170.3 (Z isomer). HREIMS  $m/z$ : 344.1149 [M $^+$ ] (calc. for C $_{18}$ H $_{20}$ N $_2$ O $_3$ S $_1$  344.1195).

**Synthesis of 2-(ethylsulfanyl)-N'-[(4-hydroxyphenyl)methylidene]benzohydrazide (5):** This was synthesized from 4-hydroxybenzaldehyde, colorless solid (Yield: 90%). m.p. 260°C. IR (KBr) ( $\nu$ ,  $\text{cm}^{-1}$ ) 3690 (OH phenol), 3158 (NH), 1593 (C = N).  $^1\text{H}$  NMR (DMSO- $d_6$ )  $\delta$  ppm [S9 Fig](#): 1.07 (Z) [t, 3H, H8a, H8b, H8c, (Z isomer)], 1.23 (E), 2.88 (Z) [q, 2H, H7a, H7b, (Z isomer)], 2.98 (E), 6.71 (Z) [d, 2H, C13, (Z isomer)], 6.85 (E), 7.2 (Z) [d, 2H, H12, H16, (Z isomer)], 7.3 (E), 7.4 (Z) [m, 4H, H2, H3, H4, H5, (Z isomer)], 7.56 (E), 7.9 [s, 1H, H10, (Z isomer)], 8.18 (E), 9.83 [s, 1H, OH, (Z isomer)], 9.96 (E), 11.55 (E) [s, 1H, NH, (E isomer)], 11.57 (Z).  $^{13}\text{C}$  NMR (DMSO- $d_6$ )  $\delta$  ppm [S10 Fig](#): 13.82 (E) [1C, C8, (E isomer)], 14.25 (Z), 26.26 (E) [1C, C7, (E isomer)], 27.34 (Z), 115.53 [2C, C13, C15, (E isomer)], 115.69 (Z), 125.04 (E) [2C, C12, C16, (E isomer)], 125.58 (Z), 127.59 (Z) [1C, C11, (Z isomer)], 127.94 (E), 128.24 (Z) [1C, C2, (Z isomer)], 128.83 (E), 129.24 (E) [1C, C5, (E and Z isomers)], 129.54 (Z) [1C, C4, (Z isomer)], 130.28 (E), 133.37 [1C, C3, (E and Z isomers)], 135.65 (Z) [1C, C6, (Z isomer)], 135.88 (E), 138.83 (E) [1C, C1, (E and Z isomers)], 143.62 (Z) [1C, C10, (Z isomer)], 147.72 (E), 158.98 [1C, C14, (Z isomer)], 159.40 (E), 163.68 [1C, C9, (E isomer)], 169.84 (Z). HREIMS  $m/z$ : 300.0927 [M $^+$ ] (calc. for C $_{16}$ H $_{15}$ N $_2$ O $_2$ S $_1$  300.0932).

**Synthesis of 2-(ethylsulfanyl)-N'-[(3-bromo-5-chloro-2-hydroxyphenyl)methylidene]-benzohydrazide (6):** This was synthesized from 3-bromo-5-chloro-2-hydroxybenzaldehyde, the solid was recrystallized from ethanol to obtained yellow crystals (0.95gm 90%), m.p. 170°C. IR (KBr) ( $\nu$ ,  $\text{cm}^{-1}$ ) 3302 (OH phenol), 3060 (NH), 1661 (C = O), 1611 (C = N).  $^1\text{H}$  NMR (DMSO- $d_6$ )  $\delta$  ppm [S11 Fig](#): 1.2 (Z) [t, 3H, H8a, H8b, H8c, (Z isomer)], 1.23 (E), 2.51 (Z) [q, 2H, H7a, H7b,

(Z isomer), 2.97 (E), 7.3 (Z) [m, 1H, H12, (Z isomer)], 7.32 (E), 7.5 (Z) [m, 1H, H3, (Z isomer)], 7.53 (E), 7.55 (E) [m, 1H, H14, (E and Z isomers)], 7.6 (E) [d, 1H, H5, (E and Z isomers)], 7.65 (E) [m, 1H, H2, (E and Z isomers)], 7.72 (E) [d, 1H, H4, (E and Z isomers)], 8.18 (Z) [s, 1H, H10, (Z isomer)], 8.42 (E), 10.41 (Z) [s, 1H, OH, (Z isomer)], 12.23 (E), 12.43 (E) [s, 1H, NH, (E isomer)], 12.55 (Z).  $^{13}\text{C}$  NMR (DMSO- $d_6$ )  $\delta$  ppm S12 Fig: 13.72 (E) [1C, C8, (E isomer)], 14.11 (Z), 26.22 (E) [1C, C7, (E isomer)], 27.04 (Z), 110.73 [1C, C15, (Z isomer)], 110.83 (E), 120.32 (Z) [1C, C11, (Z isomer)], 123.31 (E), 125.03 (E) [1C, C3, (E and Z isomers)], 126.15 (E) [1C, C13, (E and Z isomers)], 127.91 (E) [1C, C12, (E and Z isomers)], 128.17 (Z) [1C, C6, (E and Z isomers)], 129.23 (z) [1C, C5, (Z isomer)], 129.46 (E), 130.9 (Z) [1C, C4, (Z isomer)], 132.77 (E), 133.05 (E) [1C, C1, (E and Z isomers)], 134.01 (E) [1C, C14, (E and Z isomers)], 136.37 (E) [1C, C2, (E and Z isomers)], 147.01 (E) [1C, C10, (E and Z isomers)], 152.04 (Z) [1C, C16, (Z isomer)], 153.20 (E), 163.87 (E) [1C, C9, (E isomer)], 169.73 (Z). HREIMS  $m/z$ : 411.9660 [M $^+$ ] (calc. for  $\text{C}_{16}\text{H}_{14}\text{N}_2\text{O}_2\text{BrClS}_1$  411.9648).

## Results and Discussion

### Chemistry

The condensation reaction of 2-(ethylsulfanyl)benzohydrazide with substituted aromatic aldehydes in the presence of ethanol afforded the novel 2-(ethylthio)benzohydrazone derivatives (1–6) (Fig 1). The structure of the hydrazones was confirmed by IR,  $^1\text{H}$  NMR,  $^{13}\text{C}$  NMR, and mass spectroscopy. The hydroxyl group valence vibration in the hydrazones 1, 3, 4, 5, and 6 was between  $3174\text{ cm}^{-1}$  and  $3690\text{ cm}^{-1}$ , the imine group stretching vibration and the (C=O) absorption in all the newly prepared compounds (1–6) was indicated by the  $1579\text{--}1611\text{ cm}^{-1}$  and  $1601\text{--}1661\text{ cm}^{-1}$  respectively in the IR spectra.  $^1\text{H}$  and  $^{13}\text{C}$  NMR spectra of compounds (1–6) contain two sets of signals due to the presence of E and Z configurations in solution [30].

### In vitro antioxidant activity

**DPPH Radical scavenging activity.** Compounds (1–6) were evaluated for their free radical scavenging ability and compared with five positive controls, quercetin, BHT, trolox, rutin, and ascorbic acid, and the results are shown in Table 1. Compounds 1 and 3 showed the

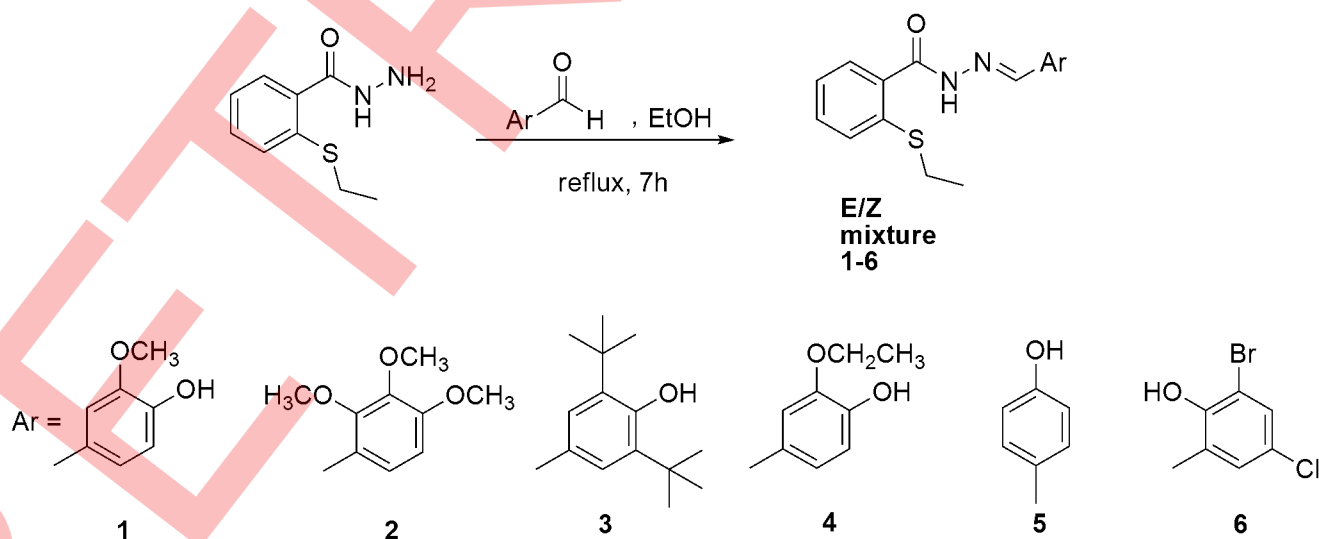

**Fig 1. Synthesis of the title compounds (1–6).**

doi:10.1371/journal.pone.0156022.g001

Table 1. Antioxidant activities for compounds (1–6).

| Compounds     | Scavenging activity DPPH <sup>a</sup> (IC <sub>50</sub> <sup>b</sup> µg/ml) | FRAP <sup>a</sup> values (µM/100g) |
|---------------|-----------------------------------------------------------------------------|------------------------------------|
| 1             | 0.69 ± 0.08                                                                 | 8966.7 ± 0.03                      |
| 2             | -                                                                           | 115.55 ± 0.17                      |
| 3             | 2.52 ± 0.11                                                                 | 394.9 ± 0.77                       |
| 4             | 3.34 ± 0.55                                                                 | 2011.1 ± 0.03                      |
| 5             | -                                                                           | 140.7 ± 1.01                       |
| 6             | -                                                                           | 132.7 ± 0.3                        |
| Quercetin     | 2.54±0.07                                                                   | 1371.11±0.26                       |
| BHT           | 18.71±0.01                                                                  | 77.83±0.08                         |
| Trolox        | 5.35±0.64                                                                   | 987.78±0.14                        |
| Rutin         | 5.25±0.01                                                                   | 393.89±0.02                        |
| Ascorbic acid | 7.52±0.08                                                                   | 1206.67±0.02                       |

<sup>a</sup> Each value represents mean ± SD.

<sup>b</sup> IC<sub>50</sub>: 50% effective concentration.

doi:10.1371/journal.pone.0156022.t001

highest radical scavenging activities, with minimum inhibitory concentration IC<sub>50</sub> values of (0.69 ± 0.08 µg/ml), and (2.52 ± 0.11 µg/ml), respectively, which are higher than the values obtained for the positive controls. Compound 4 demonstrated greater radical scavenging activity (IC<sub>50</sub>, 3.34 ± 0.55 µg/ml) than BHT, trolox, rutin, and ascorbic acid (IC<sub>50</sub>, 18.71 ± 0.01 µg/ml, 5.35 ± 0.64 µg/ml, 5.25 ± 0.01 µg/ml, and 7.52 ± 0.08 µg/ml, respectively), while compounds 2, 5 and 6 did not show radical scavenging activity in this assay.

**Ferric reducing antioxidant power (FRAP Assay).** The assay for reduction of iron (III) to iron (II) at low pH was performed to determine the FRAP values (µM/100g) of the synthesized compounds and compare them with the positive controls. Compounds 1 and 4 displayed excellent FRAP values (8966.7 ± 0.03 and 2011.1 ± 0.03, respectively), compared to the reference compounds, i.e. quercetin (1371.11 ± 0.03), BHT (77.83 ± 0.01), trolox (987.78 ± 0.01), rutin (394), and ascorbic acid (1207). Compound 3 possessed greater FRAP reducing power than rutin and BHT (395), while compounds 2, 5 and 6 showed FRAP values (116, 141 and 133, respectively) only higher than BHT as shown in Table 1.

In this study the two antioxidant activity methods presented can be classified into two groups depending on the reaction mechanism. The DPPH assay involves both hydrogen atom transfer (HAT) and electron transfer (ET) mechanisms, whereas FRAP assays involves ET mechanism [31]. A HAT-based method measures the standard ability of an antioxidant to scavenge free radicals by hydrogen donation to form stable compounds. Basically, ET mechanism detects the ability of a potential antioxidant to transfer one electron to reduce any compound, including metals, carbonyls, and radicals [32, 33]. Compounds (1–6) were evaluated for their free radical scavenging and ferric reducing ability compared with five positive controls, quercetin, BHT, trolox, rutin, and ascorbic acid Table 1. Compound 1, with the methoxy phenol showed excellent activity compared to the five positive controls. The reason for the high antioxidant activity of compound 1 can be explained by looking into the mechanism of phenolic derivatives. It has been reported that the presences of electron-withdrawing and electron-donating groups affects the bond-dissociation enthalpy of O-H, and consequently, the stabilization of phenoxy radicals [34]. Thus, electron-donating groups' e.g (methoxy) produce a reduction of the bond-dissociation enthalpy due to the stabilization of the phenoxy radical by mesomeric structures bearing a positive charge on the substituent. Replacement of the methoxy group in compound 1 with an ethoxy group, as in compound 4 decreased the antioxidant



**Table 2. Effects of compound 1 on renal function test in rats.**

| Dose       | Sodium (mmol/L) | Potassium (mmol/L) | Chloride (mmol/L) | CO <sub>2</sub> (mmol/L) | Anion gap (mmol/L) | Urea (mmol/L) | Creatinine (μmol/L) |
|------------|-----------------|--------------------|-------------------|--------------------------|--------------------|---------------|---------------------|
| Vehicle    | 141.53 ± 0.42   | 4.65 ± 0.11        | 105.63 ± 0.98     | 23.05 ± 0.44             | 18.50 ± 0.25       | 7.71 ± 0.33   | 41.280 ± 2.88       |
| (500mg/kg) | 143.01 ± 0.69   | 4.55 ± 0.13        | 103.38 ± 0.85     | 22.84 ± 0.42             | 17.38 ± 0.30       | 7.97 ± 0.28   | 43.09 ± 4.17        |

Values expressed as mean ± S.E.M. There are no significant differences between groups. Significant value at p<0.05.

doi:10.1371/journal.pone.0156022.t002

activity. This is due to the fact that the ortho-methoxyl group can form an intra-molecular hydrogen bond with the phenolic hydrogen, making H-atom abstraction from ortho-methoxy phenols surprisingly easy [35]. Interestingly, compound 3 showed high radical scavenging ability in DPPH assay even in the presence of a di-tert-butyl moiety flanking the phenolic OH. In case of compound 2 (substituted with three-OMe, compound 5 which has no substitution on the phenol ring and 6 with chloro and bromo substituent at the phenol ring these compounds have shown only poor FRAP values compared to the standard compounds. Based on our in vitro antioxidant results, the gastric ulcer study was came out to investigate the gastroprotective effect of compound 1 on ethanol-induced gastric mucosal lesions in rats.

### Acute toxicity study

In order to investigate the acute toxicity, the animals were treated with compound 1 at a dose 500 mg/kg and were kept under observation for 14 days. All the animals remained alive and did not manifest any significant visible signs of toxicity at these doses. Thus, clinical observations, serum biochemistry, and histopathology data did not show any significant differences between control and treated groups Tables 2 and 3 and Fig 2. We conclude that oral administration of compound 1 to rats was safe and that no drug-related toxicity was detected.

### pH of gastric content and mucus production

The acidity of the gastric content in experimental rats pretreated with compound 1 was decreased significantly compared to that of the ulcer control group (p<0.05). The mucus production of gastric mucosa was significantly (p<0.05) increased in animals pretreated with compound 1 compared to the ulcer control group Table 4.

### Gross pathological findings of gastric lesions

The anti-ulcer activity of compound 1 in the ethanol-induced gastric lesion model is shown in Table 4. The lesions were long, haemorrhagic and confined to the glandular portions. Results

**Table 3. Effects of compound 1 on liver function test in rats.**

| Dose       | Total protein (g/L) | Albumin (g/L) | Globulin (g/L) | TB (μmol/L)  | CB (μmol/L) | AP (IU/L)     | ALT(IU/L)    | AST (IU/L)    | GGT (IU/L)  |
|------------|---------------------|---------------|----------------|--------------|-------------|---------------|--------------|---------------|-------------|
| Vehicle    | 64.23 ± 1.28        | 11.257 ± 0.28 | 53.57 ± 1.79   | 2.00 ± 0.00  | 1.00 ± 0.00 | 111.72 ± 6.22 | 43.41 ± 1.97 | 169.10 ± 6.82 | 3.78 ± 0.39 |
| (500mg/kg) | 62.15 ± 1.19        | 10.78 ± 0.31  | 52.43 ± 1.63   | 2.00 ± 0.006 | 1.00 ± 0.00 | 98.81 ± 5.51  | 40.27 ± 2.16 | 174.25 ± 8.65 | 3.53 ± 0.51 |

Values expressed as mean ± S.E.M. There are no significant differences between groups. Significant value at p<0.05.

TB: Total bilirubin; CB: Conjugated bilirubin; AP: Alkaline phosphatase; ALT: Alanine aminotransferase; AST: Aspartate aminotransferase;GGT: G-Glutamyl Transferase.

doi:10.1371/journal.pone.0156022.t003

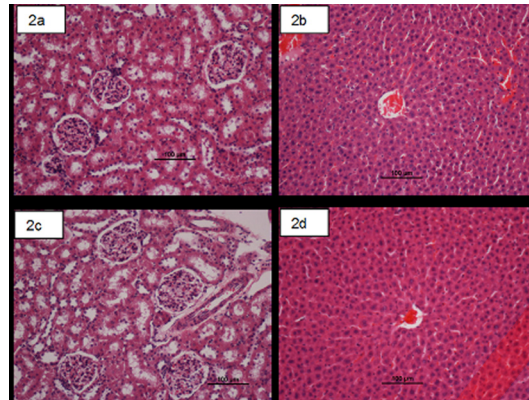

**Fig 2. Photomicrographs showing the histological sections of liver and kidney in acute toxicity test.** (2a and 2b) Rats treated with 5 ml/kg vehicle (10% Tween 20). (2c and 2d) Rats treated with compound 1 (500mg/kg). There is no significant differences in structures of liver and kidney between treated and control groups (H & E stain, magnification x20).

doi:10.1371/journal.pone.0156022.g002

showed that rats pre-treated with omeprazole, or compound 1 before being given absolute alcohol, had significantly reduced areas of gastric ulcer formation compared to rats pre-treated with (ulcer control group) (Fig 3). An obvious haemorrhagic bands of gastric mucosa have been produced by absolute ethanol. However, compound 1 (50 mg/kg) significantly reduced the formation of the ulcers with noticeable flattening of gastric mucosal folds. It was also observed that protection of gastric mucosa was the most prominent in rats pre-treated with 100 mg/kg of compound 1 Table 4. Furthermore, ethanol-induced mucosal damage was significantly reduced in the size and severity by pretreatment of the animals with compound 1. These results are significantly comparable with omeprazole, the standard drug used to treat gastric ulcer, Table 4 and Fig 3.

### Histopathological findings of gastric lesions

Microscopic observation using H and E stain in ulcer control group relatively exhibited extensive mucosal necrotic lesions, marked oedema and leucocytic infiltration of the submucosal layer (Fig 4). On the other hand, the rats that pretreated with compound 1 had remarkably a dose-dependent cytoprotective effect as demonstrated by reduction of ulcer area, submucosal oedema and inflammatory cells' infiltration (Fig 4).

### Mucus (PAS) staining

Upsurge in the glycogen content of the gastric mucosa was confirmed based on the raise in the level of PAS staining (magenta colour) in groups treated with compound 1 (Fig 5). However, the gastric ulcer control group showed the reduction in PAS staining level.

**Table 4. Effect of compound 1 on mucus production, acidity, ulcer area and inhibition percentage in rats.**

| Animal group | Pre-treatment (5ml/kg)     | pH of Gastrictissue      | Mucus weight (g)         | Ulcer Area (mm) (mean ± S.E.M) | % Inhibition |
|--------------|----------------------------|--------------------------|--------------------------|--------------------------------|--------------|
| 1            | 10% Twee20 (ulcer control) | 2.95±0.40                | 0.512±0.015              | 850.00±14.43                   | -            |
| 2            | Omeprazole (20mg/kg)       | 5.60±0.50 <sup>a</sup>   | 0.46±0.025 <sup>a</sup>  | 178±9.6 <sup>a</sup>           | 79           |
| 3            | Compound 1 (50 mg/kg)      | 5.02 ± 0.48 <sup>a</sup> | 0.50 ± 0.098             | 63.36 ± 34.80 <sup>a</sup>     | 92.6         |
| 4            | Compound 1 (100 mg/kg)     | 3.9±0.9 <sup>a</sup>     | 0.44 ± 0.06 <sup>a</sup> | 18.72 ± 5.42 <sup>a</sup>      | 97.8         |
| 5            | Normal                     | 7.05±0.6 <sup>a</sup>    | 0.586±0.031              | 0                              | -            |

Values are assumed as mean ± S.E.M. The statistical analysis was assessed with one-way ANOVA (post hoc analysis) with P < 0.05.

\*Significant differences when compared to group 1.

doi:10.1371/journal.pone.0156022.t004

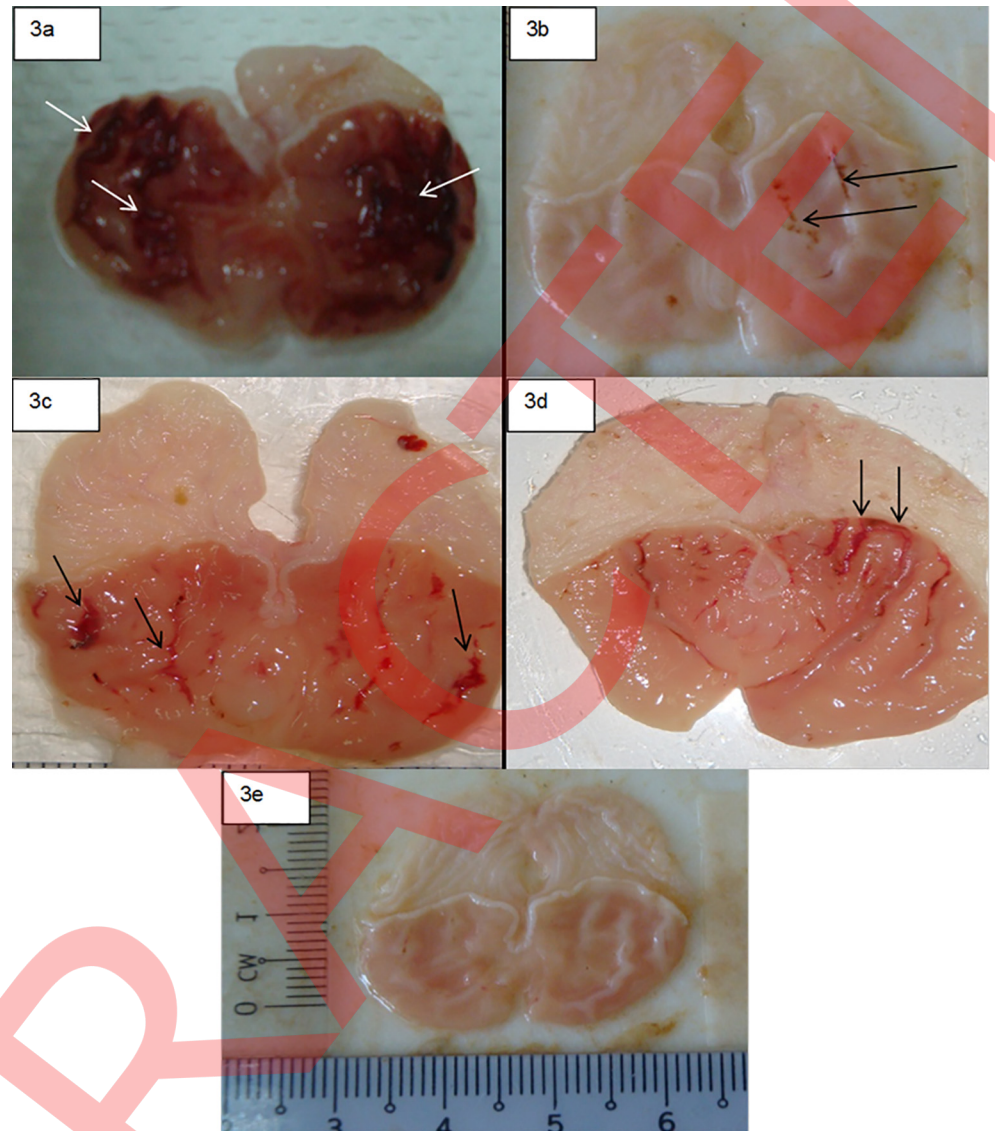

**Fig 3. Photographs showing the gross appearance of the gastric mucosa in rats.** (3a) Rats pre-treated with 5 ml/kg 10% Tween 20 (ulcer control). Severe injuries are seen in the gastric mucosa (arrow). Absolute ethanol produced extensive visible haemorrhagic necrosis of the gastric mucosa. (3b) Rats pre-treated with of omeprazole (20 mg/kg). Injuries to the gastric mucosa are very milder (arrow) compared to the injuries seen in the ulcer control rats. (3c) Rat pre-treated with compound 1 (50 mg/kg). Moderate injuries are seen in the gastric mucosa (arrow). The compound reduces the formation of gastric lesions induced by absolute ethanol. (3d). Rats pre-treated with (100 mg/kg) of compound 1, mild injuries are seen in the gastric mucosa (arrow). (3e) Rats in the normal control group showed intact gastric mucosa.

doi:10.1371/journal.pone.0156022.g003

### Immunohistochemistry of HSP-70 and Bax

HSP-70 expression was up regulated in compound 1 pretreated-animals more than that observed in ulcer control group (Fig 6). This suggests the potential gastroprotective effect of this protein in compound 1. Meanwhile, there was down regulation of Bax protein expression in compound 1 pretreated-animals compared to the ulcer control group (Fig 7). This suppressive effect on Bax protein in treatment group might be contributed in the gastroprotective activity of compound 1 as described previously [25].



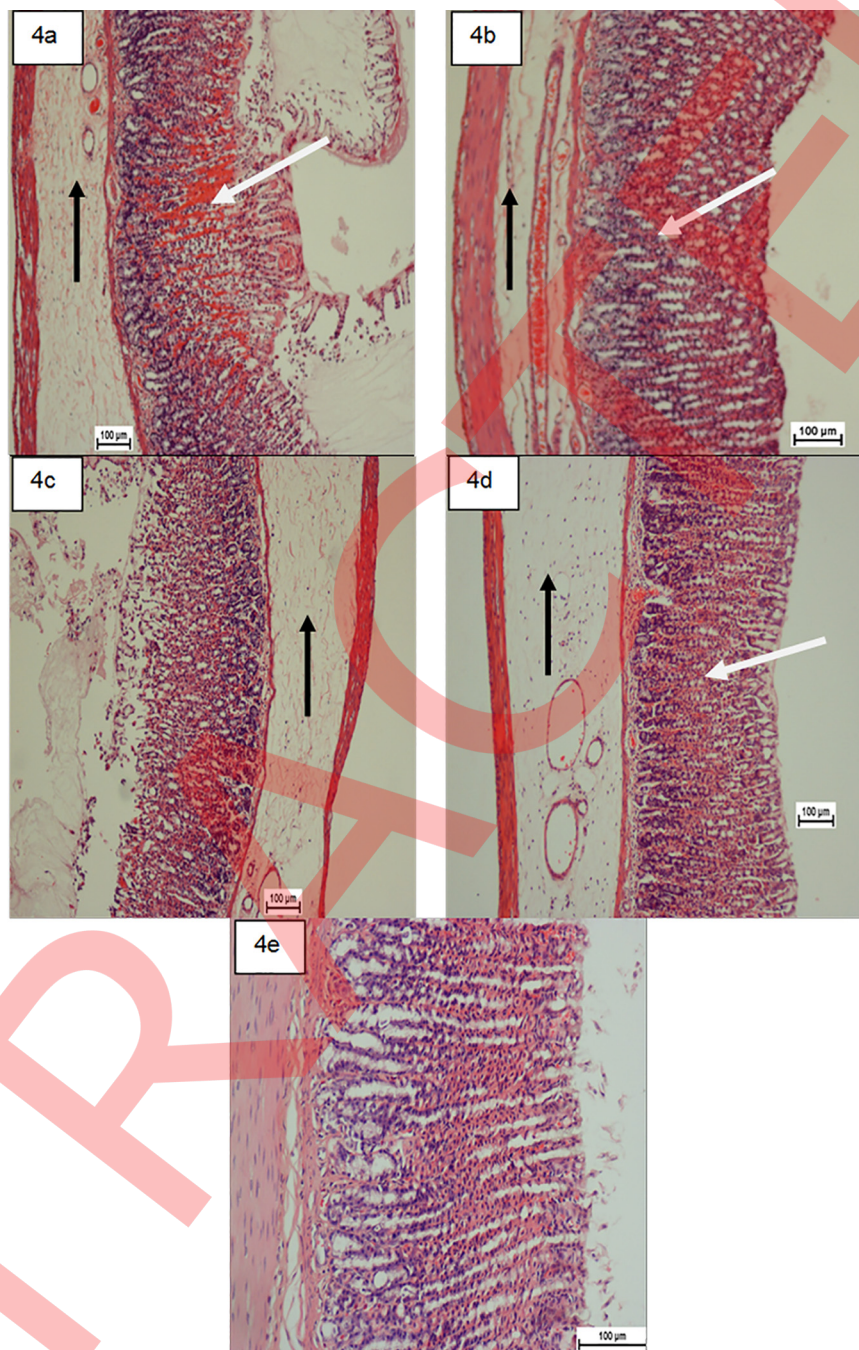

**Fig 4. Photomicrographs showing the histological study of the absolute ethanol-induced gastric mucosal damage in rats.** (4a) Rats pre-treated with 5 ml/kg of 10% Tween 20 (ulcer control). There is severe disruption to the surface epithelium and necrotic lesions penetrate deeply into mucosa (white arrow) and extensive edema of submucosa layer and leucocyte infiltration are present (black arrow). (4b) Rats pre-treated with omeprazole (20 mg/kg). Mild disruption of the surface epithelium mucosa is present (white arrow) but deep mucosal damage is absent. Reduction of submucosal edema and leucocytes infiltration (black arrow). (4c) Rat pre-treated with compound 1 (50 mg/kg), mild disruption of surface epithelium are present but deep mucosal damage is absent. Reduction of submucosal edema and leucocytes infiltration (black arrow). (4d) Rat pre-treated with compound 1 (100 mg/kg), mild disruption of surface epithelium is present but deep mucosal damage is absent. Reduction of submucosal edema and leucocytes infiltration (black arrow). (4e) Rats in the normal control group showed intact gastric mucosa.

doi:10.1371/journal.pone.0156022.g004



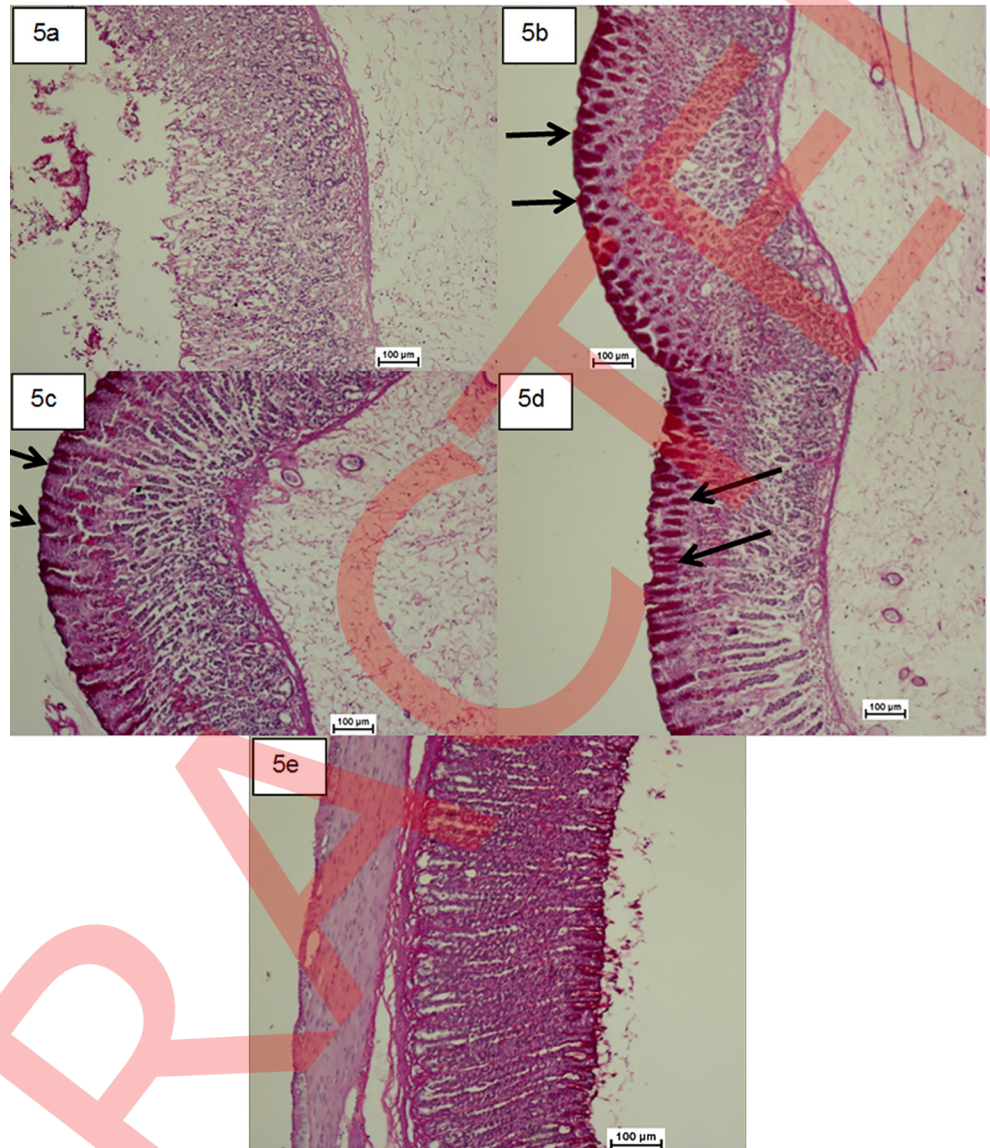

**Fig 5. Photomicrographs showing the effect of the compound 1 on gastric tissue glycoprotein-PAS staining (x20).** (5a) the ulcer control group, (5b) the reference group (omeprazole, 20 mg/kg), (5c) rats received 50 mg/kg of the compound 1 (5d) rats received 100 mg/kg of the compound 1. Magenta colour in the apical epithelial cells in the treated groups with the compound shows gradual increase in mucosal secretion of gastric glands. The intense secretion of mucus in gastric glands is demonstrated in 5d. The arrow points to the glycoprotein accumulation. (5e) Rats in the normal control group showed intact gastric mucosa.

doi:10.1371/journal.pone.0156022.g005

Based on the results obtained in this study, the gastric gavage of absolute alcohol caused a noticeable gastric mucosal injury grossly and histologically. The gastric defensive elements such as mucus and mucosa circulation were severely impaired by ethanol-induced gastric lesions. Ethanol produces necrotic damage of the gastric mucosa in a multifactorial way [27]. It can cause disruption of the mucus-bicarbonate barrier in the gastric mucosa and damaging the wall of blood vessels. These effects are presumably due to different molecular actions, such as oxidative stress and free radicals formation, lipid peroxidation, and modifications in permeability and depolarization of the mitochondrial membrane prior to cell death [12]. In the

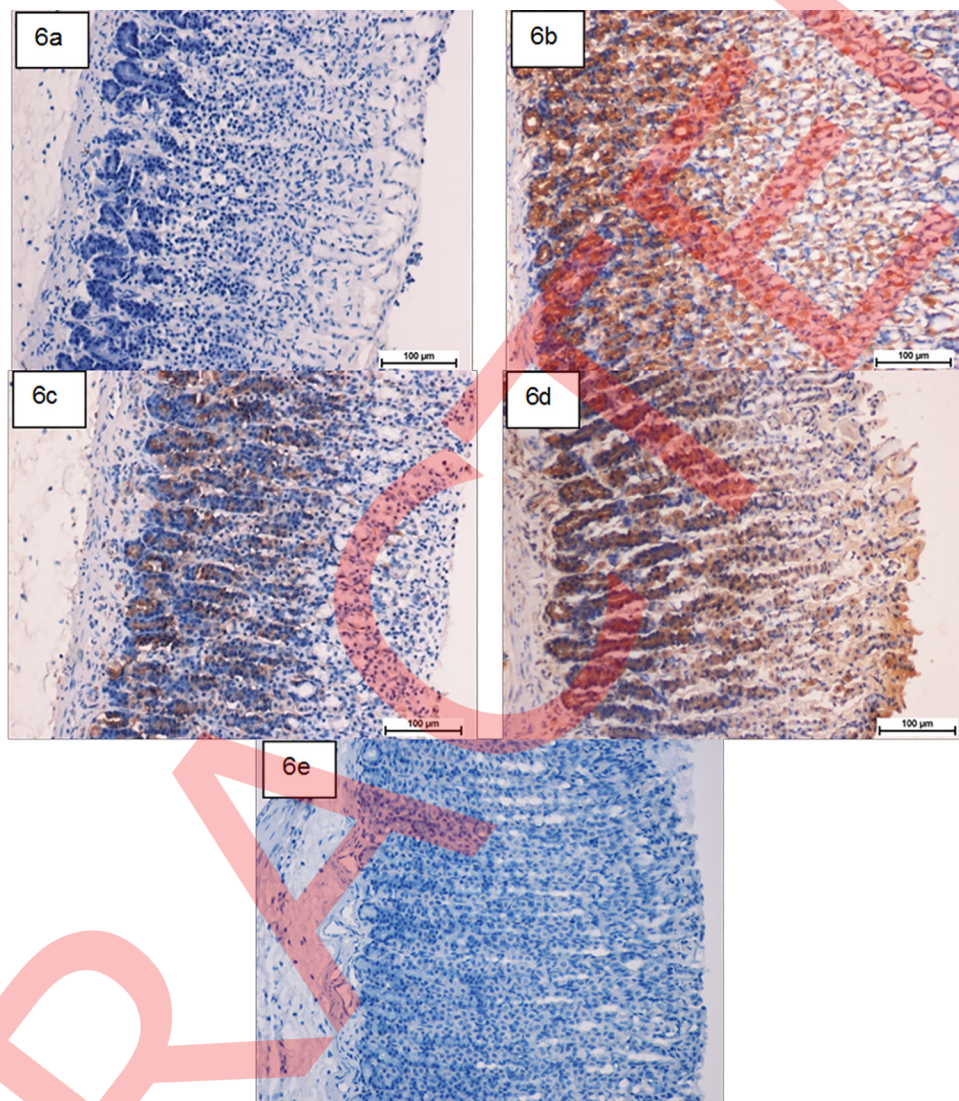

**Fig 6. Photomicrographs showing the immunohistochemical analysis of HSP-70 protein.** (6a) ulcer control group, (6b) omeprazole group, (6c and 6d) the pre-treated groups with compound 1 at doses 50 and 100 mg/kg, respectively. (6e) Rats in the normal control group showed intact gastric mucosa. The antigen site appears as a brown color (IHC:  $\times 20$ ).

doi:10.1371/journal.pone.0156022.g006

present study, compound 1 has a potent antisecretory and anti-ulcer action against ethanol-induced gastric mucosal injury, and it decreases the acidity and increases the mucus of gastric content, and this is consistent with results of a previous report [29]. Similarly, mucus secretion is considered as an imperative defensive factor in protecting the gastric mucosa from any kind of lesions [27, 36]. Pretreatment with compound 1 could to some extent minimize the ulcer area and hinder the ulcerative damage. In majority of the cases with gastric ulcer, the etiology is unknown; however, it is generally assented that an imbalance between acid and pepsin production and mucosal integrity would be the responsible factor acting via endogenous defence mechanisms as reported by Al Rashdi et al., 2012 [27]. Peptic ulcers are caused by an imbalance between the protective and the aggressive mechanisms of the mucosa, and are the result of the association of several endogenous factors and aggressive exogenous factors that are related to



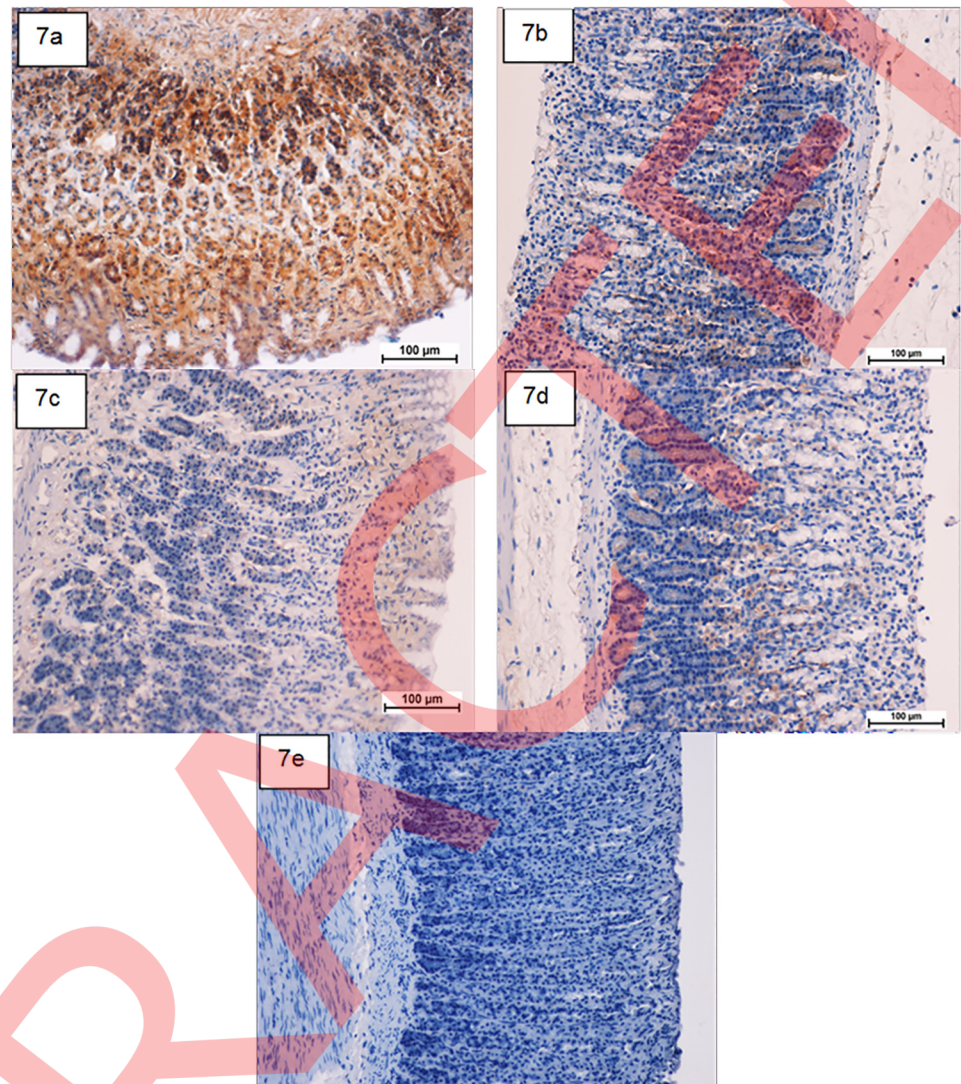

**Fig 7. Photomicrographs showing the immunohistochemical analysis of Bax protein.** (7a) ulcer control group, (7b) omeprazole group, (7c and 7d) the pre-treated groups with compound 1 at doses 50 and 100 mg/kg, respectively. (7e) Rats in the normal control group showed intact gastric mucosa. The antigen site appears as a brown color (IHC:  $\times 20$ ).

doi:10.1371/journal.pone.0156022.g007

living conditions [37, 38]. It has been reported that significant antiulcer effects could be due to strengthening of gastric mucosa with the enhancement of mucosal defence [39]. Signs of toxicity and mortality have not been shown by acute toxicity test. Behavioural alterations like, restlessness, irritation, abnormal movement and respiratory distress throughout a period of 14 days were not observed. This suggested that compound 1 is safe and has no toxicity when administered orally up to 500mg/kg and these results are consistent with other reported studies [27, 40].

Omeprazole, a cytoprotective agent, exhibits an anti-secretory and protective effect[41], and compound 1 protected the stomach against ethanol's necrotic damage and its effect was more distinct than omeprazole. Ulcer area parameter was used for the evaluation of antiulcer activity since ulcer formation is directly related to factors such as gastric volume and acidity. In case of

vehicle (ulcer control), increased the acid secretion, which consecutively caused increase in gastric volume, low pH, increased acidity resulting into increase in ulcer area [42]. Omeprazole, a proton pump inhibitor (PPI) showed a satisfactory results in the protection of gastric mucosa and has been broadly used as an acid inhibitor agent for the treatment of disorders related to gastric acid secretion for about 15 years [41]. Almost complete suppression of acid secretion is produced by PPIs. Basically, the mechanism of action of omeprazole is to bind to specific single subunit of the H<sup>+</sup>, K<sup>+</sup>-ATPase (adenosine triphosphatase) at the secretory surface of parietal cell to inactivate and reduce the acid secretion regardless of the source of secretory stimulation [27]. By increasing intragastric pH through inhibition of acid secretion, PPIs inhibit the activation of pepsin. PPI is highly selective for the proton pump and undergoes catalyzed conversion into an active form within the acid-forming space. The active inhibitors react with SH (thiol) group of the proton pump, resulting in inhibition of acid formation. The long and short term use of them is extremely effective in treating peptic ulcer disease and gastroesophageal reflux [43]. ROS seem to play a crucial role in the formation of lipid peroxides, accompanied by a defect of anti-oxidant enzyme activity of cells which are ultimately involved in the pathogenesis of different diseases including gastric mucosal damage as demonstrated in the previous studies [27, 44].

Antioxidants could assist to protect gastric cellular injury caused by oxidative stress and intensify the body's defence systems against degenerative diseases. Administration of antioxidants impedes ethanol-induced gastric injury in rats [45, 46]. It was evident by a previous data obtained using animal models of indomethacin and stress-induced gastric ulcer and pylorus ligation-induced acid secretion that omeprazole acts as a potent antioxidant to scavenge the endogenous  $\cdot\text{OH}$ , thereby forbidding the tissue damage which results from lipid peroxidation and protein oxidation [47]. Moreover, *in vitro* study has shown that the antioxidant property of omeprazole offered an antiapoptotic effect by blocking DNA fragmentation during ulceration [48]. In this study, compound 1 has shown to have antioxidant activity to scavenge the free radicals and it is likely that the gastroprotective effect exerted by this compound could be attributed to its antioxidant property which conceivably seems similar to that of omeprazole activity [40].

The result of the present study also revealed protection of the gastric mucosa and inhibition of leucocyte infiltration of gastric wall in rats pretreated with compound 1. In fact, Al Rashidi et al., 2012 [27] showed that the infiltration of activated neutrophils is involved in the initial processes of formation of the lesion. Similarly, Mahmood et al., 2011 [24], demonstrated that the reduction of neutrophil infiltration into ulcerated gastric tissue actively promotes the prevention of gastric ulcers in rats. Absolute alcohol could extensively damage the gastric mucosa leading to increased neutrophil infiltration into the gastric mucosa. Oxygen free radicals derived from infiltrated neutrophils in ulcerated gastric tissues inhibit the healing of gastric ulcer in rats. Neutrophils mediate lipid peroxidation through the production of superoxide anions [49]. Neutrophils are a major source of inflammatory mediators and can release potent ROS such as superoxide, hydrogen peroxide and myeloperoxidase derived oxidants. These ROS are highly cytotoxic and can produce tissue damage [50, 51]. DPPH test is one of the most dependent and frequently used method to measure the antioxidant activity of any substance [52]. Our results showed that compound 1 could exhibit antioxidant properties approximately comparable to commercial antioxidants. It has been reported that many synthetic and natural compounds possess powerful antioxidant impact through various mechanisms, are effective in healing experimentally induced gastric ulcer [53, 54]. We anticipate that the antioxidant activity of compound 1 could potentially play a role in the flattening of the gastric mucosal folds and decrease in gastric motility as previously described [40]. It is reported that the changes in the gastric motility may play a role in the progression and prevention of experimental gastric



lesions [25]. Relaxation of circular muscles may protect the gastric mucosa through flattening of the folds. This will increase the mucosal area exposed to necrotizing agents and reduce the volume of the gastric irritants on rugal folds [25]. Ethanol produces a remarkable contraction of the circular muscles of rat fundic strip. Such a contraction can lead to mucosal compression at the site of the greatest mechanical stress, at the crests of rugal folds leading to necrosis and ulceration [23].

Many studies have reported the role of heat-shock protein (HSP70) in maintaining normal protein structures and survival of cells under oxidative stress [55]. The expression of HSP70 shows a crucial role in the protective mechanism and at the cellular level in ethanol-induced gastric ulcer [56]. Our study shows that there are up regulation of HSP70 expression in the gastric tissues of rats pre-treated with compound 1 and omeprazole in ethanol-induced gastric ulcer, presumably due to antioxidant effect of compound 1 and omeprazole to attenuate the oxidative damage of ethanol.

Physiologically, gastric mucosa has equilibrium between the dead and renewable cells to maintain the gastric integrity. Otherwise, the gastric lesion will result if there is suppression of cell proliferation or continuous process of apoptosis or programmed cell death [57]. Several researchers showed that Bax proteins enhance apoptosis process [58]. In the present data, immunohistochemical study shows that there is down regulation of the Bax protein localization in the gastric tissue of the rats pre-treated with compound 1 compared with ulcer control group and similar result belongs to that of omeprazole pre-treated group. The results indicate the anti-apoptotic property of compound 1 against ethanol-induced gastric ulceration.

## Conclusions

New 2-(ethylthio)benzohydrazone derivatives were prepared and evaluated for their antioxidant activity *in vitro*. Schiff base 1 possessed an excellent antioxidant activity among the compounds studied, whether through hydrogen or electron transfer mechanisms, and therefore, this compound was selected in order to illustrate its anti-ulcer effect on ethanol-induced gastric mucosal lesions in rats. *In vivo* study of compound 1 revealed that this compound did not cause any sign of acute toxicity in rats. This compound could significantly preserve the gastric mucosa against ethanol-induced injury. Such role was determined grossly with the significant improvement in the gastric mucus in comparison with the ulcer control group. Furthermore, the reduction of haemorrhagic mucosal areas as well as the reduction or inhibition of edema and leukocytes infiltration of the submucosal layer was shown histologically. The possible mechanisms underlying this gastroprotective effect of compound 1 is due to potent antioxidant activity besides HSP-70 up regulation and Bax protein down regulation.

## Supporting Information

**S1 Fig.** <sup>1</sup>H-NMR (400MHz, DMSO-d<sub>6</sub>) of compound 1. (TIFF)

**S2 Fig.** <sup>13</sup>C-NMR (100MHz, DMSO-d<sub>6</sub>) of compound 1. (TIFF)

**S3 Fig.** <sup>1</sup>H-NMR (400MHz, DMSO-d<sub>6</sub>) of compound 2. (TIFF)

**S4 Fig.** <sup>13</sup>C-NMR (100MHz, DMSO-d<sub>6</sub>) of compound 2. (TIFF)

**S5 Fig.**  $^1\text{H-NMR}$  (400MHz, DMSO- $d_6$ ) of compound 3.  
(TIFF)

**S6 Fig.**  $^{13}\text{C-NMR}$  (100MHz, DMSO- $d_6$ ) of compound 3.  
(TIFF)

**S7 Fig.**  $^1\text{H-NMR}$  (400MHz, DMSO- $d_6$ ) of compound 4.  
(TIFF)

**S8 Fig.**  $^{13}\text{C-NMR}$  (100MHz, DMSO- $d_6$ ) of compound 4.  
(TIFF)

**S9 Fig.**  $^1\text{H-NMR}$  (400MHz, DMSO- $d_6$ ) of compound 5.  
(TIFF)

**S10 Fig.**  $^{13}\text{C-NMR}$  (100MHz, DMSO- $d_6$ ) of compound 5.  
(TIFF)

**S11 Fig.**  $^1\text{H-NMR}$  (400MHz, DMSO- $d_6$ ) of compound 6.  
(TIFF)

**S12 Fig.**  $^{13}\text{C-NMR}$  (100MHz, DMSO- $d_6$ ) of compound 6.  
(TIFF)

## Acknowledgments

The authors would like to express their gratitude to the staff of the Animal House in University of Malaya for the care and supply of the experimental rats.

## Author Contributions

Conceived and designed the experiments: NN AA MAA. Performed the experiments: NN MAA. Analyzed the data: NN FK. Contributed reagents/materials/analysis tools: AA MAA WY. Wrote the paper: NN FK WY. Editing the paper: WY AA ZA.

## References

1. Lee W-L, Huang J-Y, Shyur L-F. Phytoagents for cancer management: Regulation of nucleic acid oxidation, ros, and related mechanisms. *Oxidative medicine and cellular longevity*. 2013; 2013.
2. Yehye WA, Rahman NA, Ariffin A, Hamid SBA, Alhadi AA, Kadir FA, et al. Understanding the chemistry behind the antioxidant activities of butylated hydroxytoluene (BHT): A review. *European journal of medicinal chemistry*. 2015; 101:295–312. doi: [10.1016/j.ejmech.2015.06.026](https://doi.org/10.1016/j.ejmech.2015.06.026) PMID: [26150290](https://pubmed.ncbi.nlm.nih.gov/26150290/)
3. Repetto M, Llesuy S. Antioxidant properties of natural compounds used in popular medicine for gastric ulcers. *Brazilian journal of medical and biological research*. 2002; 35(5):523–34. PMID: [12011936](https://pubmed.ncbi.nlm.nih.gov/12011936/)
4. Kwiecien S, Konturek P, Sliwowski Z, Mitis-Musiol M, Pawlik M, Brzozowski B, et al. Interaction between selective cyclooxygenase inhibitors and capsaicin-sensitive afferent sensory nerves in pathogenesis of stress-induced gastric lesions. Role of oxidative stress. *Journal of Physiology and Pharmacology*. 2012; 63(2):143. PMID: [22653901](https://pubmed.ncbi.nlm.nih.gov/22653901/)
5. Nakamura T, Ohta Y, Ikeno K, Ohashi K, Ikeno T. Protective Effect of Repeatedly Preadministered Brazilian Propolis Ethanol Extract against Stress-Induced Gastric Mucosal Lesions in Rats. *Evidence-Based Complementary and Alternative Medicine*. 2014; 2014.
6. Bhattacharyya A, Chattopadhyay R, Mitra S, Crowe SE. Oxidative stress: an essential factor in the pathogenesis of gastrointestinal mucosal diseases. *Physiological reviews*. 2014; 94(2):329–54. doi: [10.1152/physrev.00040.2012](https://doi.org/10.1152/physrev.00040.2012) PMID: [24692350](https://pubmed.ncbi.nlm.nih.gov/24692350/)
7. Mózsik G, Jávör T. A biochemical and pharmacological approach to the genesis of ulcer disease. *Digestive diseases and sciences*. 1988; 33(1):92–105. PMID: [3276471](https://pubmed.ncbi.nlm.nih.gov/3276471/)

8. Bardi D, Khan MS, Sabri S, Kadir F, Mahmood A, Zahra A, et al. Anti-ulcerogenic activity of Typhonium flagelliforme aqueous leaf extract against ethanol-induced gastric mucosal injury in rats. *Scientific Research and Essays*. 2011; 6(15):3232–9.
9. Karthikeyan MS, Prasad DJ, Poojary B, Bhat KS, Holla BS, Kumari NS. Synthesis and biological activity of Schiff and Mannich bases bearing 2, 4-dichloro-5-fluorophenyl moiety. *Bioorganic & medicinal chemistry*. 2006; 14(22):7482–9.
10. El-Sayed NA, Awadallah FM, Ibrahim NA, El-Saadi MT. Synthesis, anti-inflammatory and ulcerogenicity studies of some substituted pyrimido [1, 6-a] azepine derivatives. *European journal of medicinal chemistry*. 2010; 45(7):3147–54. doi: [10.1016/j.ejmech.2010.04.005](https://doi.org/10.1016/j.ejmech.2010.04.005) PMID: [20444529](https://pubmed.ncbi.nlm.nih.gov/20444529/)
11. Zhang L-Y, Yang F, Shi W-Q, Zhang P, Li Y, Yin S-F. Synthesis and antigastric ulcer activity of novel 5-isopropyl-3, 8-dimethylazulene derivatives. *Bioorganic & medicinal chemistry letters*. 2011; 21(19):5722–5.
12. Hajrezaie M, Golbabapour S, Hassandarvish P, Gwaram NS, Hadi AHA, Ali HM, et al. Acute toxicity and gastroprotection studies of a new schiff base derived copper (II) complex against ethanol-induced acute gastric lesions in rats. 2012. doi: [10.1371/journal.pone.0051537](https://doi.org/10.1371/journal.pone.0051537) PMID: [23251568](https://pubmed.ncbi.nlm.nih.gov/23251568/)
13. Cheng L-X, Tang J-J, Luo H, Jin X-L, Dai F, Yang J, et al. Antioxidant and antiproliferative activities of hydroxyl-substituted Schiff bases. *Bioorganic & medicinal chemistry letters*. 2010; 20(8):2417–20.
14. Dhuley J. Protective effect of Rhinax, a herbal formulation against physical and chemical factors induced gastric and duodenal ulcers in rats. *Indian Journal of Pharmacology*. 1999; 31(2):128.
15. Susan G, Anuradha S, Sathiamoorthy S. Effect of alpha tocopherol on gastric ulcers induced by pylorus ligation in rats. *Indian Journal of Pharmacology*. 1999; 31(6):431.
16. Goel R, Sairam K. Anti-ulcer drugs from indigenous sources with emphasis on *Musa sapientum*, *tamrahabasma*, *Asparagus racemosus* and *Zingiber officinale*. *Indian Journal of Pharmacology*. 2002; 34(2):100–10.
17. Gerhäuser C, Klimo K, Heiss E, Neumann I, Gamal-Eldeen A, Knauff J, et al. Mechanism-based in vitro screening of potential cancer chemopreventive agents. *Mutation Research/Fundamental and Molecular Mechanisms of Mutagenesis*. 2003; 523:163–72. PMID: [12628514](https://pubmed.ncbi.nlm.nih.gov/12628514/)
18. Gorinstein S, Martin-Belloso O, Katrich E, Lojek A, Číž M, Gligelmo-Miguel N, et al. Comparison of the contents of the main biochemical compounds and the antioxidant activity of some Spanish olive oils as determined by four different radical scavenging tests. *The Journal of nutritional biochemistry*. 2003; 14(3):154–9. PMID: [12742543](https://pubmed.ncbi.nlm.nih.gov/12742543/)
19. Benzie IF, Strain J. The ferric reducing ability of plasma (FRAP) as a measure of “antioxidant power”: the FRAP assay. *Analytical biochemistry*. 1996; 239(1):70–6. PMID: [8660627](https://pubmed.ncbi.nlm.nih.gov/8660627/)
20. Abdulla MA, Ahmed KA-A, Al-Bayaty FH, Masood Y. Gastroprotective effect of *Phyllanthus niruri* leaf extract against ethanol-induced gastric mucosal injury in rats. *African Journal of Pharmacy and Pharmacology*. 2010; 4(5):226–30.
21. *Guide for the Care and Use of Laboratory Animals.*: The National Academies Press.; 1996.
22. Ghosh M. Fundamentals of experimental pharmacology. *Indian Journal of Pharmacology*. 2007; 39(4):216.
23. Ismail IF, Golbabapour S, Hassandarvish P, Hajrezaie M, Abdul Majid N, Kadir FA, et al. Gastroprotective activity of *Polygonum chinense* aqueous leaf extract on ethanol-induced hemorrhagic mucosal lesions in rats. *Evidence-Based Complementary and Alternative Medicine*. 2012; 2012.
24. Mahmood A, Fard AA, Harita H, Amin ZA, Salmah I. Evaluation of gastroprotective effects of *Strobilanthes crispus* leaf extract on ethanol-induced gastric mucosal injury in rats. *Scientific Research and Essays*. 2011; 6(11):2306–14.
25. Sidahmed HMA, Azizan AHS, Mohan S, Abdulla MA, Abdelwahab SI, Taha MME, et al. Gastroprotective effect of desmosdumotin C isolated from *Mitrella kentii* against ethanol-induced gastric mucosal hemorrhage in rats: possible involvement of glutathione, heat-shock protein-70, sulfhydryl compounds, nitric oxide, and anti-*Helicobacter pylori* activity. *BMC complementary and alternative medicine*. 2013; 13(1):183.
26. Wasman S, Mahmood A, Salehhuddin H, Zahra A, Salmah I. Cytoprotective activities of *Polygonum minus* aqueous leaf extract on ethanol-induced gastric ulcer in rats. *Journal of Medicinal Plant Research*. 2010; 4(24):2658–65.
27. AlRashdi AS, Salama SM, Alkiyumi SS, Abdulla MA, Hadi AHA, Abdelwahab SI, et al. Mechanisms of gastroprotective effects of ethanolic leaf extract of *Jasminum sambac* against HCl/ethanol-induced gastric mucosal injury in rats. *Evidence-Based Complementary and Alternative Medicine*. 2012; 2012.
28. Ketuly KA, Abdulla MA, Hadi HA, Mariod AA, Abdel-Wahab SI. Anti-ulcer activity of the 9alpha-bromo analogue of Beclomethasone dipropionate against ethanol-induced gastric mucosal injury in rats. *Journal of Medicinal Plant Research*. 2011; 5(4):514–20.

29. Hajrezaie M, Salehen N, Karimian H, Zahedifard M, Shams K, Batran RA, et al. Biochanin A Gastroprotective Effects in Ethanol-Induced Gastric Mucosal Ulceration in Rats. *PloS one*. 2015; 10(3): e0121529. doi: [10.1371/journal.pone.0121529](https://doi.org/10.1371/journal.pone.0121529) PMID: [25811625](https://pubmed.ncbi.nlm.nih.gov/25811625/)
30. Despaigne AAR, da Silva JG, do Carmo ACM, Sives F, Piro OE, Castellano EE, et al. Copper (II) and zinc (II) complexes with 2-formylpyridine-derived hydrazones. *Polyhedron*. 2009; 28(17):3797–803.
31. Prior RL, Wu X, Schaich K. Standardized methods for the determination of antioxidant capacity and phenolics in foods and dietary supplements. *Journal of agricultural and food chemistry*. 2005; 53(10):4290–302. PMID: [15884874](https://pubmed.ncbi.nlm.nih.gov/15884874/)
32. Karadag A, Ozcelik B, Saner S. Review of methods to determine antioxidant capacities. *Food Analytical Methods*. 2009; 2(1):41–60.
33. Nazarbajhat N, Nordin N, Abdullah Z, Abdulla MA, Yehye WA, Halim SNA, et al. New Thiosemicarbazides and 1, 2, 4-Triazolethiones Derived from 2-(Ethylsulfanyl) Benzohydrazide as Potent Antioxidants. *Molecules*. 2014; 19(8):11520–37. doi: [10.3390/molecules190811520](https://doi.org/10.3390/molecules190811520) PMID: [25093989](https://pubmed.ncbi.nlm.nih.gov/25093989/)
34. Wright JS, Johnson ER, DiLabio GA. Predicting the activity of phenolic antioxidants: theoretical method, analysis of substituent effects, and application to major families of antioxidants. *Journal of the American Chemical Society*. 2001; 123(6):1173–83. PMID: [11456671](https://pubmed.ncbi.nlm.nih.gov/11456671/)
35. De Heer MI, Korth H-G, Mulder P. Poly methoxy phenols in solution: OH bond dissociation enthalpies, structures, and hydrogen bonding. *The Journal of Organic Chemistry*. 1999; 64(19):6969–75.
36. Jainu M, Mohan KV, Devi CS. Gastroprotective effect of *Cissus quadrangularis* extract in rats with experimentally induced ulcer. *Indian Journal of Medical Research*. 2006; 123(6):799. PMID: [16885602](https://pubmed.ncbi.nlm.nih.gov/16885602/)
37. Maity P, Biswas K, Roy S, Banerjee RK, Bandyopadhyay U. Smoking and the pathogenesis of gastroduodenal ulcer—recent mechanistic update. *Molecular and cellular biochemistry*. 2003; 253(1–2):329–38. PMID: [14619984](https://pubmed.ncbi.nlm.nih.gov/14619984/)
38. Srikanth J, Muralidharan P. Antiulcer activity of *Morinda citrifolia* Linn fruit extract. *Journal of Scientific Research*. 2009; 1(2):345–52.
39. Sairam K, Rao CV, Goel R. Effect of *Centella asiatica* Linn on physical and chemical factors induced gastric ulceration and secretion in rats. *Indian journal of experimental biology*. 2001; 39(2):137–42. PMID: [11480209](https://pubmed.ncbi.nlm.nih.gov/11480209/)
40. Mughrabi FF, Hashim H, Ameen M, Khaledi H, editors. Cyto protective effect of bis [benzyl N'-(indol-3-ylmethylene)-hydrazinecarbodiithioato]-nickel (II) against ethanol-induced gastric mucosal injury in rats. *International Conference on Science and Social Research (CSSR)*; 2010.
41. Li X-Q, Andersson TB, Ahlström M, Weidolf L. Comparison of inhibitory effects of the proton pump-inhibiting drugs omeprazole, esomeprazole, lansoprazole, pantoprazole, and rabeprazole on human cytochrome P450 activities. *Drug metabolism and disposition*. 2004; 32(8):821–7. PMID: [15258107](https://pubmed.ncbi.nlm.nih.gov/15258107/)
42. Devaraj V, Krishna BG, Viswanatha G, Prasad VS, Babu SV. Protective effect of leaves of *Raphanus sativus* Linn on experimentally induced gastric ulcers in rats. *Saudi Pharmaceutical Journal*. 2011; 19(3):171–6. doi: [10.1016/j.jsps.2011.03.003](https://doi.org/10.1016/j.jsps.2011.03.003) PMID: [23960756](https://pubmed.ncbi.nlm.nih.gov/23960756/)
43. Schneeweiss S, Maclure M, Dormuth CR, Glynn RJ, Canning C, Avorn J. A therapeutic substitution policy for proton pump inhibitors: clinical and economic consequences. *Clinical pharmacology & therapeutics*. 2006; 79(4):379–88.
44. Sidahmed HMA, Hashim NM, Abdulla MA, Ali HM, Mohan S, Abdelwahab SI, et al. Antisecretory, Gastroprotective, Antioxidant and Anti-Helicobacter Pylori Activity of Zerumbone from Zingiber Zerumbet (L.) Smith. *PloS one*. 2015; 10(3).
45. Sathish D, Himabindu S, Shravan Kumar Y, Madhusudan Rao Y. Floating drug delivery systems for prolonging gastric residence time: a review. *Current drug delivery*. 2011; 8(5):494–510. PMID: [21696354](https://pubmed.ncbi.nlm.nih.gov/21696354/)
46. Alrdahe SS, Abdulla MA, Razak SA, Kadir FA, Hassandarvish P. Gastroprotective activity of *Swietenia mahagoni* seed extract on ethanol-induced gastric mucosal injury in rats. *World Acad Sci Eng Technol*. 2010; 43:883–7.
47. Lapenna D, Gioia Sd, Ciofani G, Festi D, Cuccurullo F. Antioxidant properties of omeprazole. *FEBS letters*. 1996; 382(1–2):189–92. PMID: [8612750](https://pubmed.ncbi.nlm.nih.gov/8612750/)
48. Biswas K, Bandyopadhyay U, Chattopadhyay I, Varadaraj A, Ali E, Banerjee RK. A novel antioxidant and antiapoptotic role of omeprazole to block gastric ulcer through scavenging of hydroxyl radical. *Journal of Biological Chemistry*. 2003; 278(13):10993–1001. PMID: [12529378](https://pubmed.ncbi.nlm.nih.gov/12529378/)
49. Kobayashi T, Ohta Y, Yoshino J, Nakazawa S. Teprenone promotes the healing of acetic acid-induced chronic gastric ulcers in rats by inhibiting neutrophil infiltration and lipid peroxidation in ulcerated gastric tissues. *Pharmacological Research*. 2001; 43(1):23–30. PMID: [11207062](https://pubmed.ncbi.nlm.nih.gov/11207062/)



50. Cheng H-c, Kao A-w, Chuang C-h, Sheu B-s. The efficacy of high-and low-dose intravenous omeprazole in preventing rebleeding for patients with bleeding peptic ulcers and comorbid illnesses. *Digestive diseases and sciences*. 2005; 50(7):1194–201. PMID: [16047459](#)
51. Swarnakar S, Ganguly K, Kundu P, Banerjee A, Maity P, Sharma AV. Curcumin regulates expression and activity of matrix metalloproteinases 9 and 2 during prevention and healing of indomethacin-induced gastric ulcer. *Journal of Biological Chemistry*. 2005; 280(10):9409–15. PMID: [15615723](#)
52. Alam MN, Bristi NJ, Rafiquzzaman M. Review on in vivo and in vitro methods evaluation of antioxidant activity. *Saudi Pharmaceutical Journal*. 2013; 21(2):143–52. doi: [10.1016/j.jsps.2012.05.002](#) PMID: [24936134](#)
53. Umamaheswari M, Asokkumar K, Rathidevi R, Sivashanmugam A, Subhadra Devi V, Ravi T. Antiulcer and in vitro antioxidant activities of *Jasminum grandiflorum* L. *Journal of Ethnopharmacology*. 2007; 110(3):464–70. PMID: [17125945](#)
54. Singh KD, Chetia D, Junejo JA. Antiulcer and in vitro antioxidant activity of *Allium hookerii*: an ethnomedicinal plant of Manipur. *Asian journal of pharmaceutical and clinical research*. 2015; 8(5).
55. Mikami KI, Otaka M, Watanabe D, Goto T, Endoh A, Miura K, et al. Zinc L-carnosine protects against mucosal injury in portal hypertensive gastropathy through induction of heat shock protein 72. *Journal of gastroenterology and hepatology*. 2006; 21(11):1669–74. PMID: [16984587](#)
56. Sidahmed HMA, Hashim NM, Amir J, Abdulla MA, Hadi AHA, Abdelwahab SI, et al. Pyranocycloartobioxanthone A, a novel gastroprotective compound from *Artocarpus obtusus* Jarret, against ethanol-induced acute gastric ulcer in vivo. *Phytomedicine*. 2013; 20(10):834–43. doi: [10.1016/j.phymed.2013.03.002](#) PMID: [23570997](#)
57. Maity P, Bindu S, Choubey V, Alam A, Mitra K, Goyal M, et al. Lansoprazole protects and heals gastric mucosa from non-steroidal anti-inflammatory drug (NSAID)-induced gastropathy by inhibiting mitochondrial as well as Fas-mediated death pathways with concurrent induction of mucosal cell renewal. *Journal of Biological Chemistry*. 2008; 283(21):14391–401. doi: [10.1074/jbc.M800414200](#) PMID: [18375387](#)
58. Konturek PC, Brzozowski T, Konturek S, Pajdo R, Konturek J, Kwiecień S, et al. Apoptosis in gastric mucosa with stress-induced gastric ulcers. *Journal of physiology and pharmacology: an official journal of the Polish Physiological Society*. 1999; 50(2):211–25.
